# Supplementary material for: Maternal OGTT Glucose Levels at 26–30 Gestational Weeks with Offspring Growth and Development in Early Infancy
Source: Hindawi journal article supplement (doi:10.1155/2014/516980), 2014-01-01
Supplement: f1 [file 516980.f1.pdf]

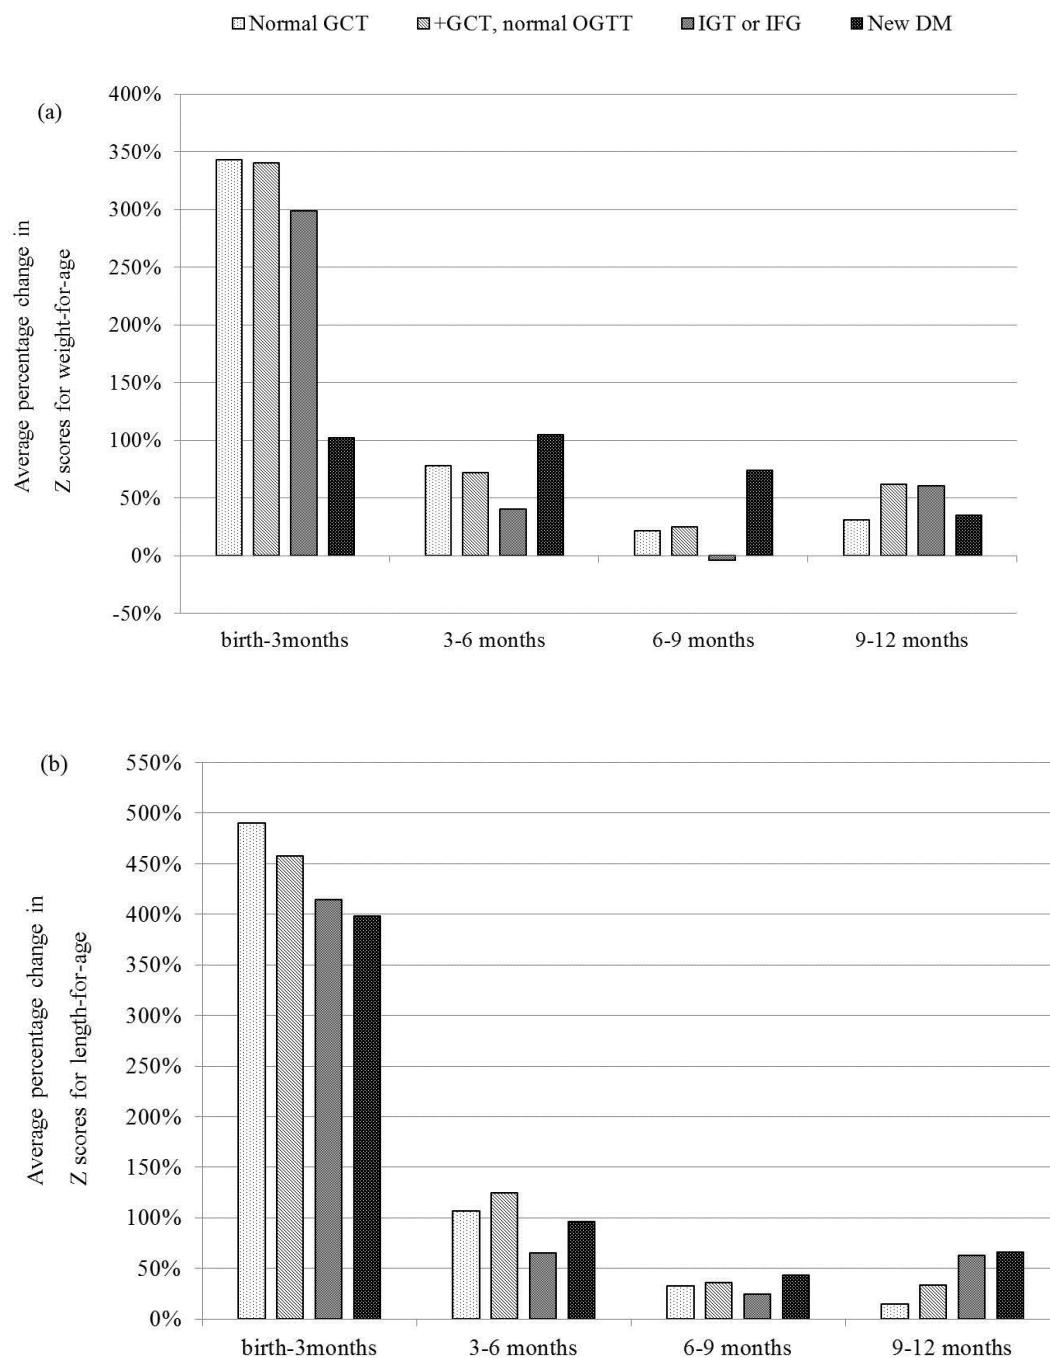

**Online Figure 1:** Average percentage change in Z-scores for body weight (a) and body length (b) from birth to months 3, 6, 9, and 12 according to maternal OGTT at 26-30 gestational weeks

Online Table 1. Comparison of Z-scores for body length and weight-for-length by gender from birth to months 3, 6, 9, and 12 according to maternal OGTT at 26-30 gestational weeks

|                                    | Total        | Maternal OGTT at 26-30 gestational weeks |                   |             |             | P for       |
|------------------------------------|--------------|------------------------------------------|-------------------|-------------|-------------|-------------|
|                                    |              | Normal GCT                               | +GCT, normal OGTT | IGT or IFG  | New DM      | differences |
| Birth for gestational weeks        |              |                                          |                   |             |             |             |
| Boys                               |              |                                          |                   |             |             |             |
| No. of subjects                    | 14 090       | 12 147                                   | 1 178             | 684         | 81          |             |
| Length-for-gestational age z-score | -0.06 (0.90) | -0.08 (0.90)                             | -0.03 (0.86)      | 0.06 (0.91) | 0.25 (1.21) | <0.001      |
| Weight-for-length z-score          | 0.02 (1.00)  | -0.01 (0.99)                             | 0.12 (0.98)       | 0.26 (1.08) | 0.52 (1.36) | <0.001      |
| Girls                              |              |                                          |                   |             |             |             |
| No. of subjects                    | 13 067       | 11 361                                   | 1 051             | 592         | 63          |             |
| Length-for-gestational age z-score | -0.07 (0.91) | -0.08 (0.91)                             | -0.01 (0.96)      | 0.07 (0.91) | 0.20 (1.10) | <0.001      |
| Weight-for-length z-score          | 0.03 (1.00)  | 0.004 (0.98)                             | 0.19 (1.04)       | 0.27 (1.08) | 0.64 (1.15) | <0.001      |
| 3 month                            |              |                                          |                   |             |             |             |
| Boys                               |              |                                          |                   |             |             |             |

|                                    |             |             |             |             |             |       |
|------------------------------------|-------------|-------------|-------------|-------------|-------------|-------|
| No. of subjects                    | 12 803      | 11 042      | 1 073       | 619         | 69          |       |
| Length-for-gestational age z-score | 0.80 (1.06) | 0.81 (1.06) | 0.75 (1.02) | 0.77 (1.08) | 0.87 (1.26) | 0.261 |
| Weight-for-length z-score          | 0.44 (1.08) | 0.44 (1.07) | 0.51 (1.08) | 0.45 (1.14) | 0.20 (1.04) | 0.053 |
| Girls                              |             |             |             |             |             |       |
| No. of subjects                    | 11 919      | 10 379      | 944         | 535         | 61          |       |
| Length-for-gestational age z-score | 0.93 (0.99) | 0.94 (0.99) | 0.89 (1.02) | 0.81 (0.93) | 0.71 (1.12) | 0.005 |
| Weight-for-length z-score          | 0.32 (1.00) | 0.31 (1.00) | 0.39 (1.02) | 0.35 (0.97) | 0.40 (1.11) | 0.063 |
| 6 month                            |             |             |             |             |             |       |
| Boys                               |             |             |             |             |             |       |
| No. of subjects                    | 13 137      | 11 300      | 1 121       | 641         | 75          |       |
| Length-for-gestational age z-score | 0.92 (1.07) | 0.93 (1.08) | 0.85 (1.02) | 0.89 (1.11) | 0.81 (1.14) | 0.070 |
| Weight-for-length z-score          | 0.75 (1.07) | 0.75 (1.07) | 0.77 (1.11) | 0.72 (1.14) | 0.63 (1.18) | 0.667 |
| Girls                              |             |             |             |             |             |       |
| No. of subjects                    | 12 263      | 10 660      | 989         | 554         | 60          |       |
| Length-for-gestational age z-score | 1.02 (1.03) | 1.03 (1.02) | 1.03 (1.08) | 0.90 (0.99) | 0.83 (0.98) | 0.014 |

|                                    |             |             |             |             |             |       |
|------------------------------------|-------------|-------------|-------------|-------------|-------------|-------|
| Weight-for-length z-score          | 0.65 (0.99) | 0.64 (0.98) | 0.67 (1.04) | 0.67 (1.00) | 0.77 (1.07) | 0.539 |
| 9 month                            |             |             |             |             |             |       |
| Boys                               |             |             |             |             |             |       |
| No. of subjects                    | 11 892      | 10 221      | 1 017       | 588         | 66          |       |
| Length-for-gestational age z-score | 0.82 (1.08) | 0.83 (1.08) | 0.76 (1.06) | 0.79 (1.11) | 0.81 (1.08) | 0.302 |
| Weight-for-length z-score          | 0.80 (1.04) | 0.79 (1.03) | 0.82 (1.04) | 0.79 (1.10) | 0.85 (1.07) | 0.803 |
| Girls                              |             |             |             |             |             |       |
| No. of subjects                    | 11 028      | 9 599       | 880         | 501         | 48          |       |
| Length-for-gestational age z-score | 0.93 (1.00) | 0.94 (1.00) | 0.88 (1.00) | 0.83 (0.96) | 0.74 (0.90) | 0.016 |
| Weight-for-length z-score          | 0.71 (0.95) | 0.71 (0.95) | 0.75 (0.95) | 0.69 (0.91) | 0.73 (1.04) | 0.615 |
| 12 month                           |             |             |             |             |             |       |
| Boys                               |             |             |             |             |             |       |
| No. of subjects                    | 12 165      | 10 437      | 1 054       | 607         | 67          |       |
| Length-for-gestational age z-score | 0.72 (1.08) | 0.72 (1.08) | 0.67 (1.03) | 0.65 (1.10) | 0.68 (1.16) | 0.186 |
| Weight-for-length z-score          | 0.82 (1.02) | 0.81 (1.02) | 0.87 (0.99) | 0.85 (1.05) | 0.88 (1.16) | 0.240 |

|                                    |             |             |             |             |             |       |
|------------------------------------|-------------|-------------|-------------|-------------|-------------|-------|
| Girls                              |             |             |             |             |             |       |
| No. of subjects                    | 11 279      | 9 766       | 934         | 523         | 56          |       |
| Length-for-gestational age z-score | 0.81 (1.00) | 0.82 (1.00) | 0.75 (1.00) | 0.70 (0.88) | 0.72 (0.99) | 0.015 |
| Weight-for-length z-score          | 0.75 (0.94) | 0.74 (0.94) | 0.85 (0.93) | 0.77 (0.89) | 0.80 (1.00) | 0.006 |

Data are means (SD).

OGTT, oral glucose tolerance test; IFG, impaired fasting glucose; IGT, impaired glucose tolerance; New DM, newly diagnosed diabetes mellitus.

Online Table 2. Changes in Z-scores for body length for age and weight for length by gender for each three months and from birth to months 12 according to maternal OGTT at 26-30 gestational weeks

| Changes in Z-scores | Maternal OGTT at 26-30 gestational weeks |                   |             |              | P for       |
|---------------------|------------------------------------------|-------------------|-------------|--------------|-------------|
|                     | Normal GCT                               | +GCT, normal OGTT | IGT or IFG  | New DM       | differences |
| From 0 to 3 months  |                                          |                   |             |              |             |
| Boys                |                                          |                   |             |              |             |
| No. of subjects     | 11 041                                   | 1 073             | 619         | 69           |             |
| Length-for-age      | 0.88 (0.01)                              | 0.80 (0.03)       | 0.80 (0.04) | 0.81 (0.12)  | 0.037       |
| Weight-for-length   | 0.43 (0.01)                              | 0.41 (0.04)       | 0.23 (0.05) | -0.20 (0.16) | <0.001      |
| Girls               |                                          |                   |             |              |             |
| No. of subjects     | 10 378                                   | 944               | 535         | 61           |             |
| Length-for-age      | 1.01 (0.01)                              | 0.94 (0.03)       | 0.83 (0.04) | 0.69 (0.12)  | <0.001      |
| Weight-for-length   | 0.30 (0.01)                              | 0.21 (0.04)       | 0.13 (0.06) | -0.12 (0.16) | <0.001      |
| From 3 to 6 months  |                                          |                   |             |              |             |
| Boys                |                                          |                   |             |              |             |
| No. of subjects     | 10 464                                   | 1 031             | 591         | 65           |             |
| Length-for-age      | 0.12 (0.01)                              | 0.09 (0.03)       | 0.11 (0.04) | -0.09 (0.11) | 0.179       |
| Weight-for-length   | 0.31 (0.01)                              | 0.26 (0.03)       | 0.27 (0.04) | 0.45 (0.12)  | 0.169       |
| Girls               |                                          |                   |             |              |             |
| No. of subjects     | 9 902                                    | 901               | 511         | 59           |             |
| Length-for-age      | 0.10 (0.01)                              | 0.14 (0.03)       | 0.06 (0.04) | 0.13 (0.11)  | 0.315       |
| Weight-for-length   | 0.33 (0.01)                              | 0.30 (0.03)       | 0.31 (0.04) | 0.29 (0.11)  | 0.583       |
| From 6 to 9 months  |                                          |                   |             |              |             |

|                     |              |              |              |              |        |
|---------------------|--------------|--------------|--------------|--------------|--------|
| Boys                |              |              |              |              |        |
| No. of subjects     | 9 764        | 983          | 562          | 63           |        |
| Length-for-age      | -0.09 (0.01) | -0.09 (0.03) | -0.11 (0.03) | -0.13 (0.10) | 0.916  |
| Weight-for-length   | 0.05 (0.01)  | 0.06 (0.03)  | 0.05 (0.03)  | 0.22 (0.10)  | 0.367  |
| Girls               |              |              |              |              |        |
| No. of subjects     | 9 228        | 844          | 473          | 47           |        |
| Length-for-age      | -0.08 (0.01) | -0.13 (0.03) | -0.07 (0.03) | 0.001 (0.11) | 0.334  |
| Weight-for-length   | 0.06 (0.01)  | 0.06 (0.03)  | 0.004 (0.03) | -0.01 (0.11) | 0.387  |
| From 9 to 12 months |              |              |              |              |        |
| Boys                |              |              |              |              |        |
| No. of subjects     | 9 172        | 926          | 548          | 56           |        |
| Length-for-age      | -0.11 (0.01) | -0.11 (0.03) | -0.14 (0.03) | -0.09 (0.10) | 0.841  |
| Weight-for-length   | 0.02 (0.01)  | 0.05 (0.03)  | 0.06 (0.03)  | 0.14 (0.10)  | 0.333  |
| Girls               |              |              |              |              |        |
| No. of subjects     | 8 606        | 813          | 465          | 43           |        |
| Length-for-age      | -0.13 (0.01) | -0.16 (0.03) | -0.13 (0.03) | -0.12 (0.11) | 0.558  |
| Weight-for-length   | 0.03 (0.01)  | 0.10 (0.03)  | 0.07 (0.03)  | 0.09 (0.11)  | 0.026  |
| From 0 to 12 months |              |              |              |              |        |
| Boys                |              |              |              |              |        |
| No. of subjects     | 10 436       | 1 054        | 607          | 67           |        |
| Length-for-age      | 0.80 (0.01)  | 0.70 (0.04)  | 0.62 (0.05)  | 0.50 (0.15)  | <0.001 |
| Weight-for-length   | 0.82 (0.01)  | 0.76 (0.04)  | 0.59 (0.05)  | 0.36 (0.15)  | <0.001 |
| Girls               |              |              |              |              |        |

|                   |             |             |             |             |        |
|-------------------|-------------|-------------|-------------|-------------|--------|
| No. of subjects   | 9 765       | 934         | 523         | 56          |        |
| Length-for-age    | 0.89 (0.01) | 0.77 (0.04) | 0.64 (0.05) | 0.51 (0.16) | <0.001 |
| Weight-for-length | 0.72 (0.01) | 0.66 (0.04) | 0.51 (0.05) | 0.20 (0.16) | <0.001 |

Data are means (SE). IFG, impaired fasting glucose; IGT, impaired glucose tolerance; New DM, newly diagnosed diabetes mellitus.

Model was adjusted for maternal age, prepregnancy BMI, weight gain during pregnancy, family history of diabetes, education of mother, income, mode of infant feeding, and birth length-for-gestational age Z-score in change length-for-age Z-score, birth weight-for-birth length Z-score in change weight-for-length Z-score.
